# Supplementary material for: Contrasting effect of 1-butanol and 1,4-butanediol on the triggered micellar self-assemblies of C16-type cationic surfactants
Source: Royal Society of Chemistry journal article supplement (doi:10.1039/d1cp01666k), 2021-01-01
Supplement: d1cp01666k1.pdf [file d1cp01666k1.pdf]

**Supplementary Information to**

**Contrasting effect of 1-butanol and 1, 4-butanediol on the triggered micellar self-assemblies of C<sub>16</sub>-type cationic surfactants**

Vinod Kumar<sup>1</sup>, Rajni Verma<sup>2</sup>, Dwarkesh Satodia<sup>1</sup>, Debes Ray<sup>3</sup>, Ketan Kuperkar<sup>1, \*</sup>,  
Vinod Kumar Aswal<sup>3</sup>, Katie R. Mitchell-Koch<sup>2</sup>, Pratap Bahadur<sup>4</sup>

<sup>1</sup>*Department of Chemistry, Sardar Vallabhbhai National Institute of Technology (SVNIT),  
Surat 395007, Gujarat, India.*

<sup>2</sup>*Department of Chemistry, Wichita State University (WSU),  
Wichita, Kansas 67260-0051, United States.*

<sup>3</sup>*Solid State Physics Division, Bhabha Atomic Research Centre (BARC),  
Mumbai 400 085, Maharashtra, India.*

<sup>4</sup>*Department of Chemistry, Veer Narmad South Gujarat University (VNSGU),  
Udhana-Magdalla road, Surat 395007, Gujarat, India.*

**Table S1.** Interfacial descriptors for surfactants in H<sub>2</sub>O and 1M (*fix*) BuOH and BTB at 303.15 K.

| Surfactant | Solvent          | CMC (mM) | $\gamma_{\text{CMC}}$ (mN/m) | $\pi_{\text{CMC}}$ (mN/m) | $\Gamma_{\text{max}}$ ( $\times 10^{-6}$ mol m <sup>-2</sup> ) | $A_{\text{min}}$ ( $\text{\AA}^2$ ) |
|------------|------------------|----------|------------------------------|---------------------------|----------------------------------------------------------------|-------------------------------------|
| CPB        | H <sub>2</sub> O | 0.790    | 38.5                         | 32.0                      | 2.04                                                           | 81.3                                |
|            | 1M BTB           | 0.279    | 44.0                         | 26.5                      | 1.19                                                           | 139.8                               |
|            | 1M BuOH          | 0.013    | 27.1                         | 43.4                      | 0.79                                                           | 804.9                               |
| CTPPB      | H <sub>2</sub> O | 0.376    | 44.2                         | 26.3                      | 0.73                                                           | 229.1                               |
|            | 1M BTB           | 0.052    | 44.3                         | 26.2                      | 0.62                                                           | 266.6                               |
|            | 1M BuOH          | 0.008    | 25.0                         | 45.5                      | 0.17                                                           | 952.7                               |
| CTAT       | H <sub>2</sub> O | 0.327    | 37.4                         | 33.1                      | 2.65                                                           | 62.7                                |
|            | 1M BTB           | 0.029    | 52.2                         | 18.3                      | 0.34                                                           | 494.7                               |
|            | 1M BuOH          | 0.018    | 28.6                         | 42.0                      | 0.21                                                           | 776.2                               |

**Table S2.** Quantum chemical parameters obtained for cationic surfactant-alcohol templates.

| System       | TE (a.u.) | $E_{\text{HOMO}}$ (eV) | $E_{\text{LUMO}}$ (eV) | $\Delta E$ (eV) |
|--------------|-----------|------------------------|------------------------|-----------------|
| BTB          | -0.1655   | -0.3858                | 0.0875                 | 0.4733          |
| BuOH         | -0.1033   | -0.3817                | 0.0975                 | 0.4792          |
| CPB          | 0.0832    | -0.3007                | -0.1186                | 0.1821          |
| CPB + BTB    | -0.2628   | -0.2917                | -0.0469                | 0.2448          |
| CPB + BuOH   | -0.2126   | -0.2892                | -0.0437                | 0.2455          |
| CTPPB        | -0.0379   | -0.2644                | -0.0187                | 0.2457          |
| CTPPB + BTB  | -0.2362   | -0.2893                | -0.0166                | 0.2727          |
| CTPPB + BuOH | -0.1617   | -0.2783                | -0.0160                | 0.2623          |
| CTAT         | -0.2777   | -0.3425                | 0.0084                 | 0.3509          |
| CTAT + BTB   | -0.4719   | -0.3441                | 0.0115                 | 0.3556          |
| CTAT + BuOH  | -0.3960   | -0.3433                | 0.0154                 | 0.3587          |
